# Supplementary material
Source: publisher figshare collection journal article supplement (https://acs.figshare.com/ndownloader/files/15077972)
Supplement: Supplementary file 1 [file 15077972]

## Support information

### Predicting Novel 2D MB<sub>2</sub> (M=Ti, Hf, V, Nb, Ta) Monolayers with Ultrafast Dirac Transport Channel and Electron-orbital Controlled Negative Poisson's Ratio

Chunmei Zhang<sup>1</sup>, Tianwei He<sup>1</sup>, Sri Kasi Matta<sup>1</sup>,  
Ting Liao<sup>1</sup>, Liangzhi Kou<sup>1</sup>, Zhongfang Chen<sup>2</sup>, Aijun Du<sup>1,\*</sup>

<sup>1</sup>*School of Chemistry, Physics and Mechanical Engineering, Queensland University of Technology, Gardens Point Campus, Brisbane, QLD 4001, Australia*

<sup>2</sup>*Department of Chemistry, University of Puerto Rico, Rio Piedras Campus, San Juan, Puerto Rico 00931, USA*

*Corresponding Author: Aijun Du, Email: aijun.du@qut.edu.au*

**Table S1**, the optimized lattice constants  $a$  (Å) and the buckling height  $t$  (Å) for stable MB<sub>2</sub> monolayers (M=Be, Mg, Ti, Hf, V, Nb, Ta, Fe) and agree well with previous results.

|   | TiB <sub>2</sub>              | HfB <sub>2</sub> | VB <sub>2</sub> | NbB <sub>2</sub> | TaB <sub>2</sub> | BeB <sub>2</sub>             | MgB <sub>2</sub>              | FeB <sub>2</sub>               |
|---|-------------------------------|------------------|-----------------|------------------|------------------|------------------------------|-------------------------------|--------------------------------|
| a | 3.126                         | 3.194            | 3.090           | 2.946            | 2.965            | 3.031                        | 3.018<br>(3.04 <sup>1</sup> ) | 3.171<br>(3.177 <sup>2</sup> ) |
| t | 1.196<br>(1.19 <sup>3</sup> ) | 1.417            | 1.076           | 1.681            | 1.631            | 0.582<br>(0.5 <sup>4</sup> ) | 1.686                         | 0.632<br>(0.6 <sup>2</sup> )   |

By using searching method as implemented in the CALYPSO code, two other phases of MB<sub>2</sub> are also found. We name them IT and 2H. However, their energies are higher than our investigated P6/mmm structure. Table s2 give the energies comparison between three different phases, which prove that P6/mmm is the most stable phase among them.

**Table S2**, the energies of 1T, 2H phases relative to  $P6/mmm$  for explored stable  $MB_2$  monolayers (M=Be, Mg, Ti, Hf, V, Nb, Ta, Fe)

|       | TiB <sub>2</sub> | HfB <sub>2</sub> | VB <sub>2</sub> | NbB <sub>2</sub> | TaB <sub>2</sub> | BeB <sub>2</sub> | MgB <sub>2</sub> | FeB <sub>2</sub> |
|-------|------------------|------------------|-----------------|------------------|------------------|------------------|------------------|------------------|
| P6mmm | 0                | 0                | 0               | 0                | 0                | 0                | 0                | 0                |
| 1T    | 3.741            | 0.313            | 3.261           | 3.419            | 3.351            | 1.838            | 4.298            | 2.006            |
| 2H    | 2.018            | 4.605            | 2.538           | 5.049            | 1.29             | 1.844            | 4.882            | 1.985            |

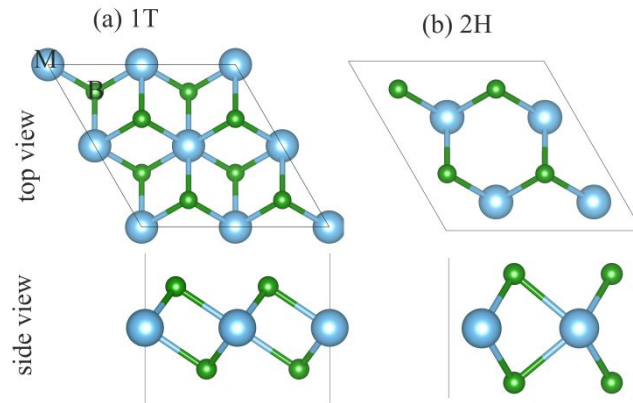

**Figure S1** (a-b) 1T and 2H phases of  $MB_2$  monolayer.

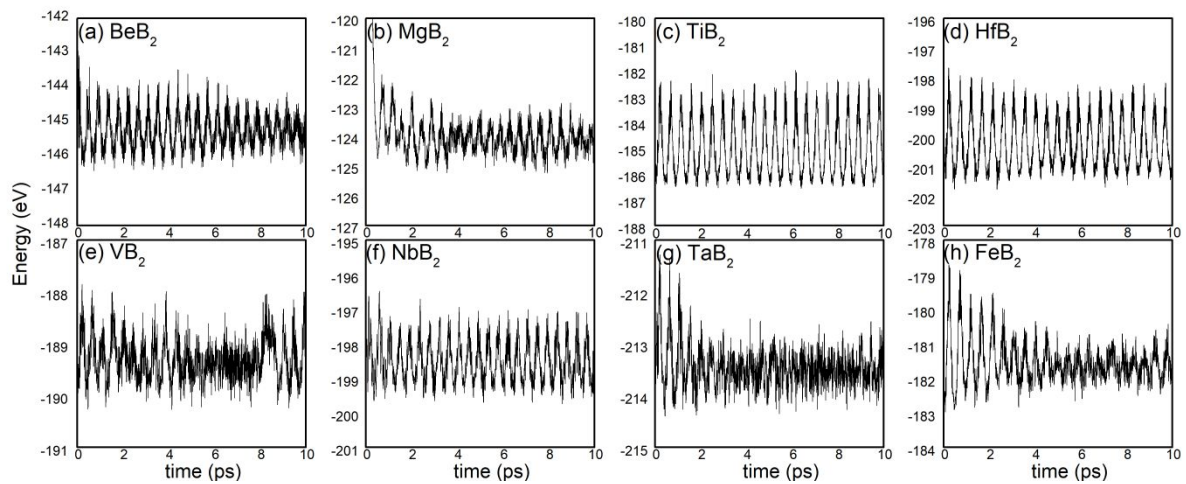

**Figure S2**. Ab initio MD simulations of the evolution of energy of  $3 \times 3 \times 1$  supercell monolayers  $MB_2$  (M= Ti, Hf, V, Nb, Ta, Be, Mg, Fe) with time running for 10 ps under 700K.

**Table S3**, the optimized lattice constants  $a$  (Å) and the buckling height  $t$  (Å) for explored unstable MB<sub>2</sub> monolayers.

|   | CaB <sub>2</sub> | BaB <sub>2</sub> | ScB <sub>2</sub> | CrB <sub>2</sub> | MoB <sub>2</sub> | WB <sub>2</sub>  | MnB <sub>2</sub> | TcB <sub>2</sub> | ReB <sub>2</sub> |
|---|------------------|------------------|------------------|------------------|------------------|------------------|------------------|------------------|------------------|
| a | 3.133            | 3.225            | 3.174            | 3.148            | 2.898            | 2.883            | 3.160            | 2.979            | 2.992            |
| t | 1.332            | 2.302            | 1.477            | 0.908            | 1.581            | 1.667            | 0.740            | 1.595            | 0.604            |
|   | RuB <sub>2</sub> | OsB <sub>2</sub> | CoB <sub>2</sub> | RhB <sub>2</sub> | IrB <sub>2</sub> | NiB <sub>2</sub> | CuB <sub>2</sub> | AgB <sub>2</sub> | ZnB <sub>2</sub> |
| a | 2.946            | 2.862            | 3.246            | 3.036            | 3.141            | 3.025            | 2.959            | 2.933            | 2.956            |
| t | 1.438            | 1.598            | 0.492            | 1.323            | 1.190            | 1.090            | 1.431            | 2.003            | 1.638            |
|   | AlB <sub>2</sub> | GaB <sub>2</sub> | InB <sub>2</sub> | GeB <sub>2</sub> | SnB <sub>2</sub> | ZrB <sub>2</sub> |                  |                  |                  |
| a | 2.996            | 2.958            | 3.069            | 3.015            | 2.965            | 3.162            |                  |                  |                  |
| t | 1.438            | 1.838            | 2.123            | 1.666            | 1.601            | 1.518            |                  |                  |                  |

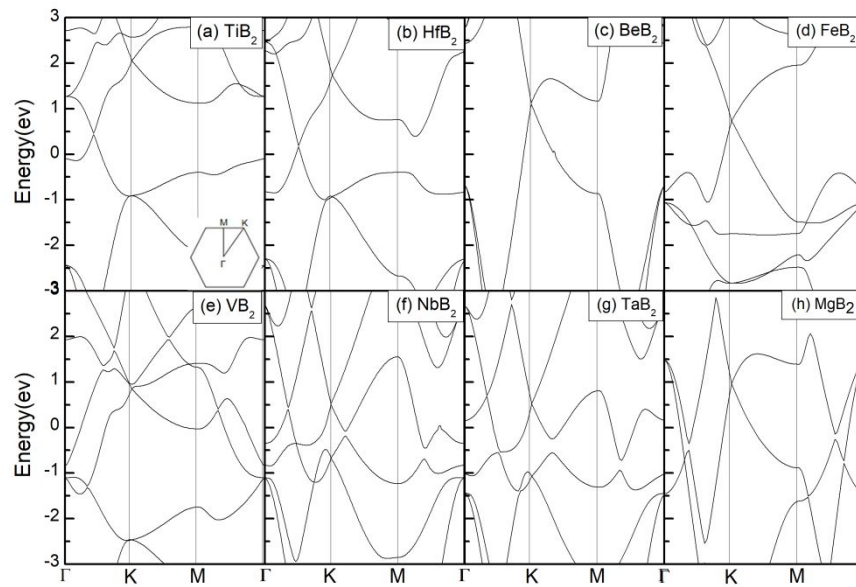

**Figure S3.** Band structure of MB<sub>2</sub> calculated by HSE method, where high-symmetry k-points are shown in the inset of (a). The Fermi level is set at the energy zero point.

**Table S4** elastic constants for MB<sub>2</sub> monolayers.

|                  | C11     | C12      | C13     | C21      | C22     | C23    |
|------------------|---------|----------|---------|----------|---------|--------|
| TiB <sub>2</sub> | 803.540 | -33.323  | 3.565   | -33.323  | 790.495 | 1.392  |
| HfB <sub>2</sub> | 650.887 | -127.178 | 6.322   | -147.253 | 642.710 | 5.501  |
| VB <sub>2</sub>  | 511.014 | -131.730 | 13.5174 | -131.730 | 525.804 | 19.479 |
| NbB <sub>2</sub> | 843.788 | -19.514  | 5.777   | -19.514  | 849.088 | 9.300  |
| TaB <sub>2</sub> | 808.816 | -64.977  | 9.014   | -64.977  | 812.799 | 10.086 |
| BeB <sub>2</sub> | 925.716 | 23.018   | 4.586   | 23.018   | 915.461 | 6.500  |
| MgB <sub>2</sub> | 775.887 | 61.341   | 10.737  | 61.341   | 737.292 | 6.382  |
| FeB <sub>2</sub> | 779.183 | 348.739  | 30.109  | 348.739  | 780.692 | 32.542 |

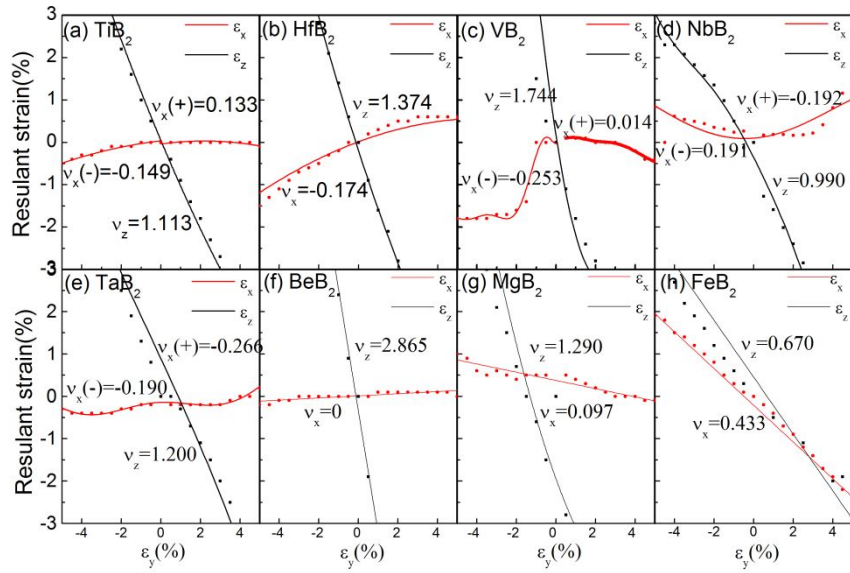

**Figure S4.** (a)-(h) Poisson's ratios for MB<sub>2</sub> (M=Ti, Hf, V, Nb, Ta, Be, Mg, Fe) as a function of strain applied along the b axis (-5%-5%). The axis x, y, and z correspond to the in-plane lateral and thickness directions, respectively.

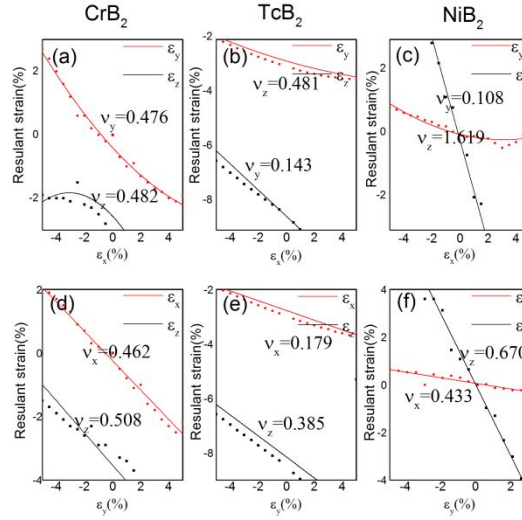

**Figure S5** (a)-(f) Poisson's ratios for  $MB_2$  ( $M=Cr, Tc, Ni$ ) as a function of strain applied along a axis and b axis (-5%-5%). The axis x, y, and z correspond to the in-plane lateral and thickness directions, respectively.

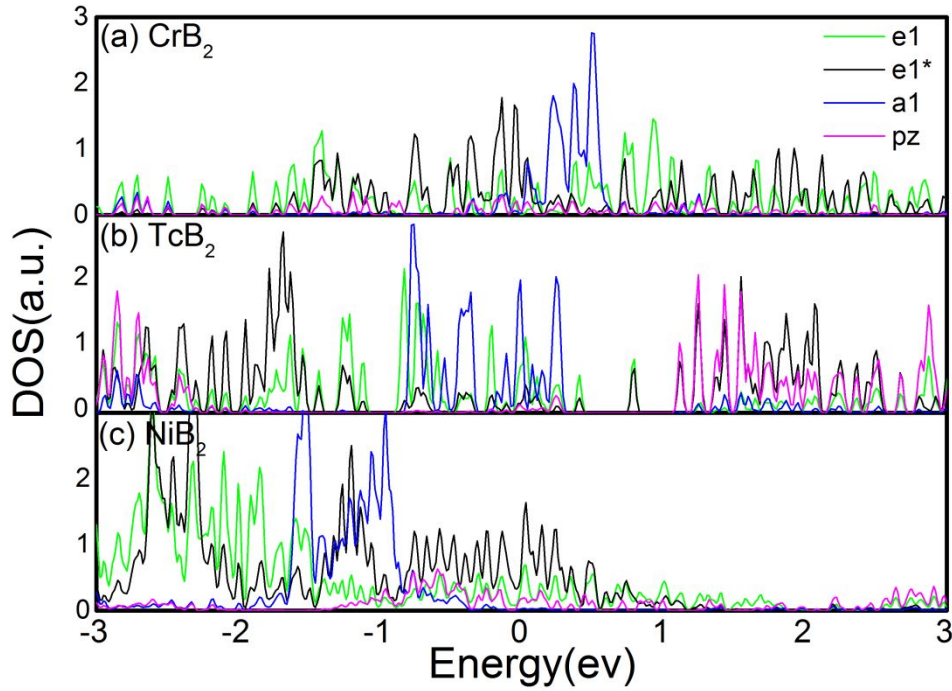

**Figure S6** | DOS of  $MB_2$ . The  $M_d-B_p$  orbital coupling manifests itself in the overlap of their DOS. The DOS shown in the figure are  $e1 = d_{xy} + d_{x^2-y^2}$ ,  $e1^* = d_{xz} + d_{yz}$  and  $a1 = d_{z^2}$ . The Fermi level is set to 0.

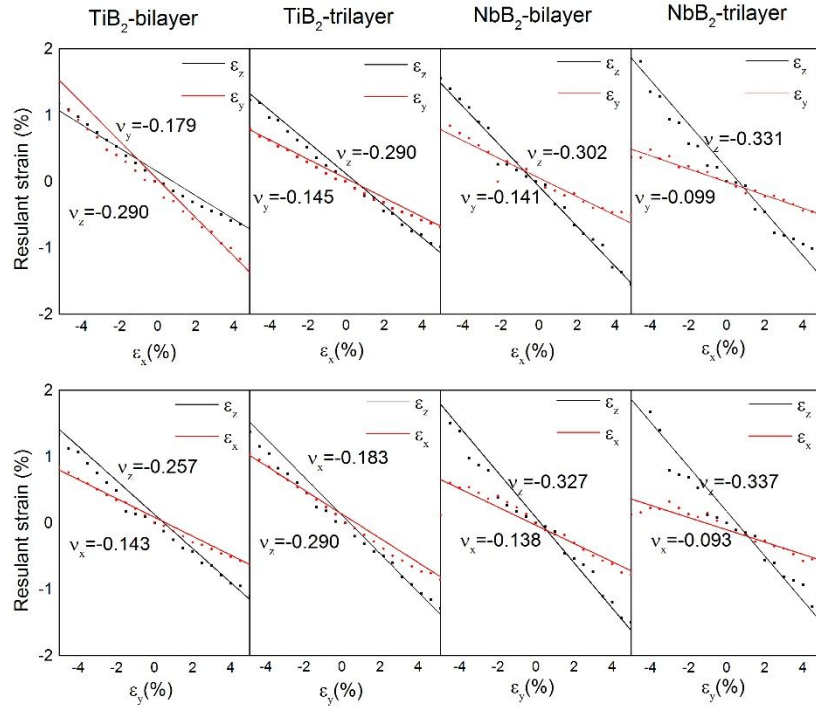

**Figure S7** Poisson's ratios for bi- and tri-layer  $MB_2$  ( $M=Ti, Nb$ ) as a function of strain applied along a axis and b axis (-5%-5%). The axis  $x$ ,  $y$ , and  $z$  correspond to the in-plane lateral and thickness directions, respectively.

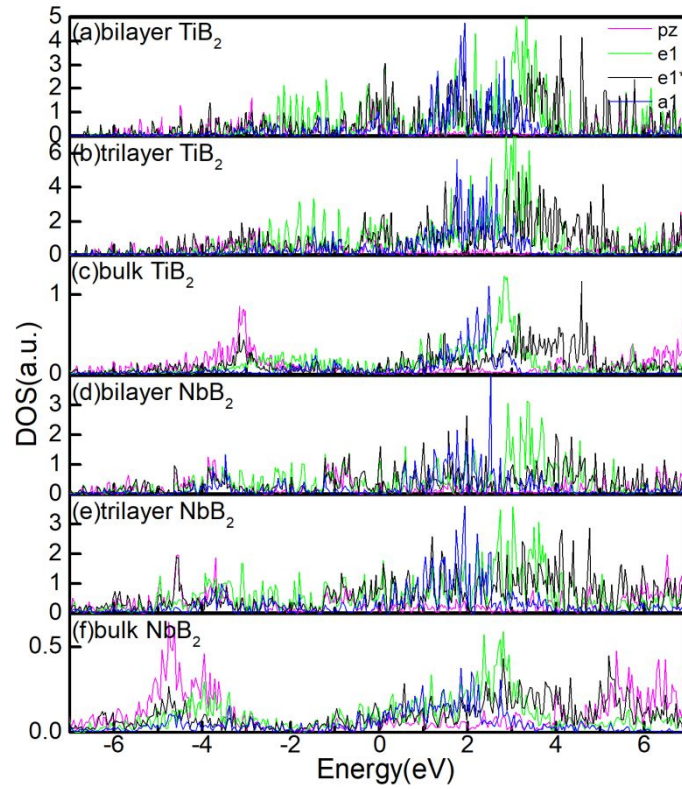

**Figure S8** | DOS of bi-, tri- layer, and bulk  $\text{TiB}_2$  and  $\text{NbB}_2$ . The M\_d-B\_p orbital coupling manifests itself in the overlap of their DOS. The DOS shown in the figure are  $e1 = d_{xy} + d_{x^2 - y^2}$ ,  $e1^* = d_{xz} + d_{yz}$ , and  $a1 = d_{z^2}$ . The Fermi level is set to 0.

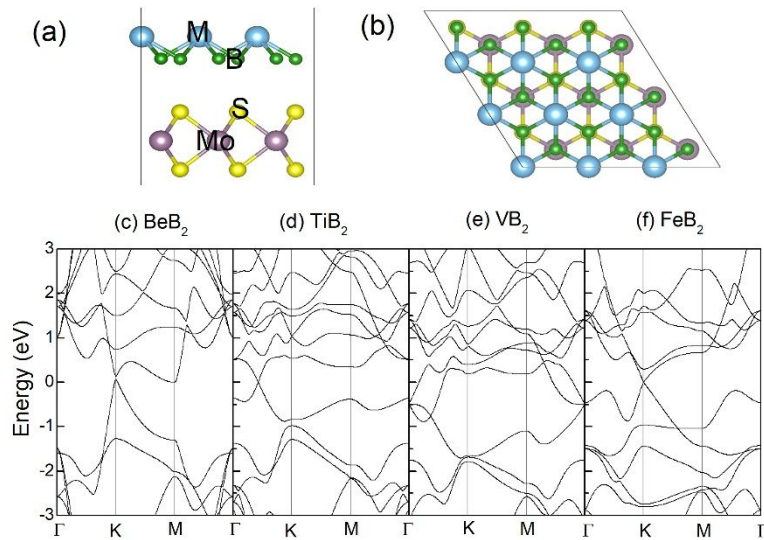

**Figure S9** (a-b) the side and top views of 3x3x1 supercell of  $\text{MB}_2$  on  $\text{MoS}_2$  substrate. (c-f) band structure of  $\text{MB}_2$  on  $\text{MoS}_2$  substrate. The Fermi level is set at the energy zero point.

## References

- (1) Bekaert, J.; Aperis, A.; Partoens, B.; Oppeneer, P.; Milošević, M. Evolution of Multigap Superconductivity in the Atomically Thin Limit: Strain-Enhanced Three-Gap Superconductivity in Monolayer  $\text{MgB}_2$ . *Phys. Rev. B* **2017**, *96*, 094510.
- (2) Zhang, H.; Li, Y.; Hou, J.; Du, A.; Chen, Z. Dirac State in the  $\text{FeB}_2$  Monolayer with Graphene-Like Boron Sheet. *Nano lett.* **2016**, *16*, 6124-6129.
- (3) Zhang, L.; Wang, Z.; Du, S.; Gao, H.-J.; Liu, F. Prediction of a Dirac State in Monolayer  $\text{TiB}_2$ . *Phys. Rev. B* **2014**, *90*, 161402.
- (4) Zhang, P.; Crespi, V. H. Theory of  $\text{B}_2\text{O}$  and  $\text{BeB}_2$  Nanotubes: New Semiconductors and Metals in One Dimension. *Phys. Rev. Lett.* **2002**, *89*, 056403.
